# Supplementary material for: Amorphous carbon coating enhances activity of high rate CO2electroreduction to CO
Source: Royal Society of Chemistry journal article supplement (doi:10.1039/d3ta01075a), 2023-01-01
Supplement: d3ta01075a1.pdf [file d3ta01075a1.pdf]

# Amorphous Carbon Coating Enhances Activity of High Rate CO<sub>2</sub> Electroreduction to CO

Yiwen Ma, Wenzhe Niu, Wenjuan Shi, Xiaoxiong Huang, Yi Liu,  
Junfeng Chen, Liangyao Xue and Bo Zhang\*

State Key Laboratory of Molecular Engineering of Polymers, Department  
of Macromolecular Science, Fudan University, Shanghai 200438,

\*E-mail addresses: [bozhang@fudan.edu.cn](mailto:bozhang@fudan.edu.cn)

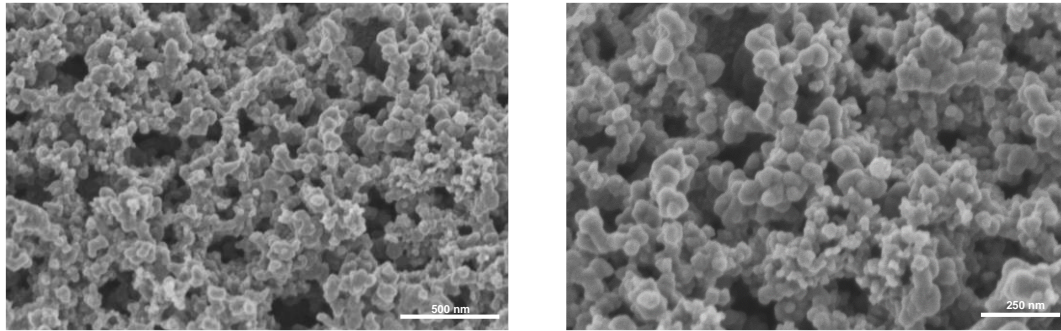

**Fig. S1.** The scanning electron microscopy images of Ag/C.

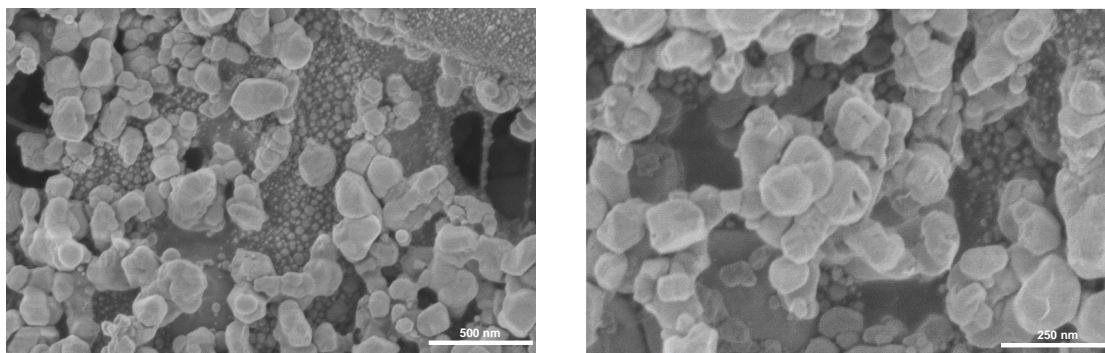

**Fig. S2.** The scanning electron microscopy images of Ag.

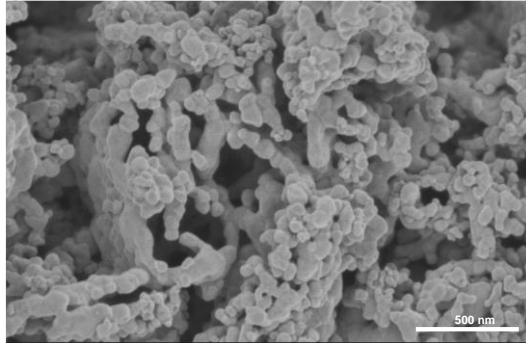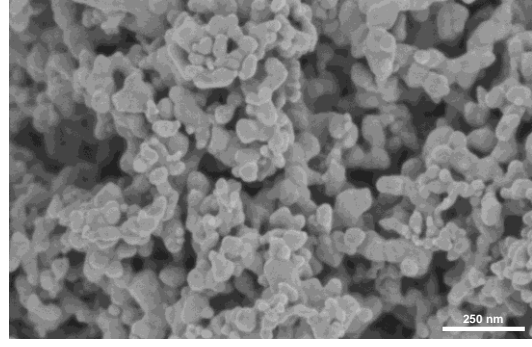

**Fig. S3.** The scanning electron microscopy images of Ag nano.

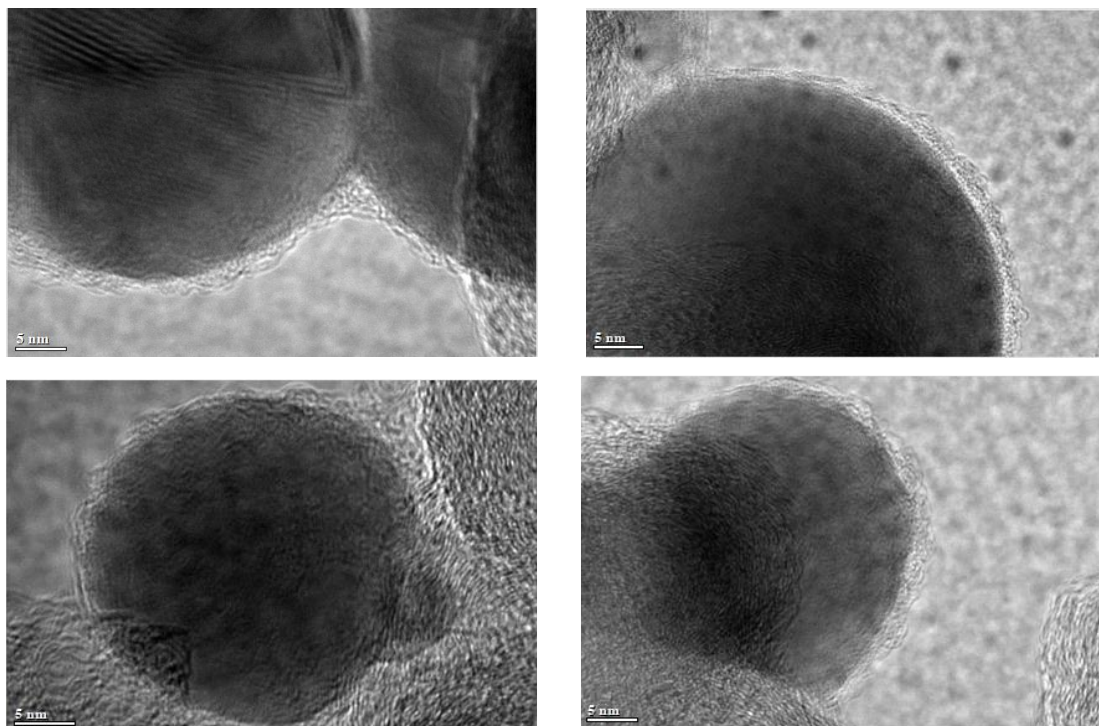

**Fig. S4.** The different high-resolution transmission electron microscopy images of the Ag/C.

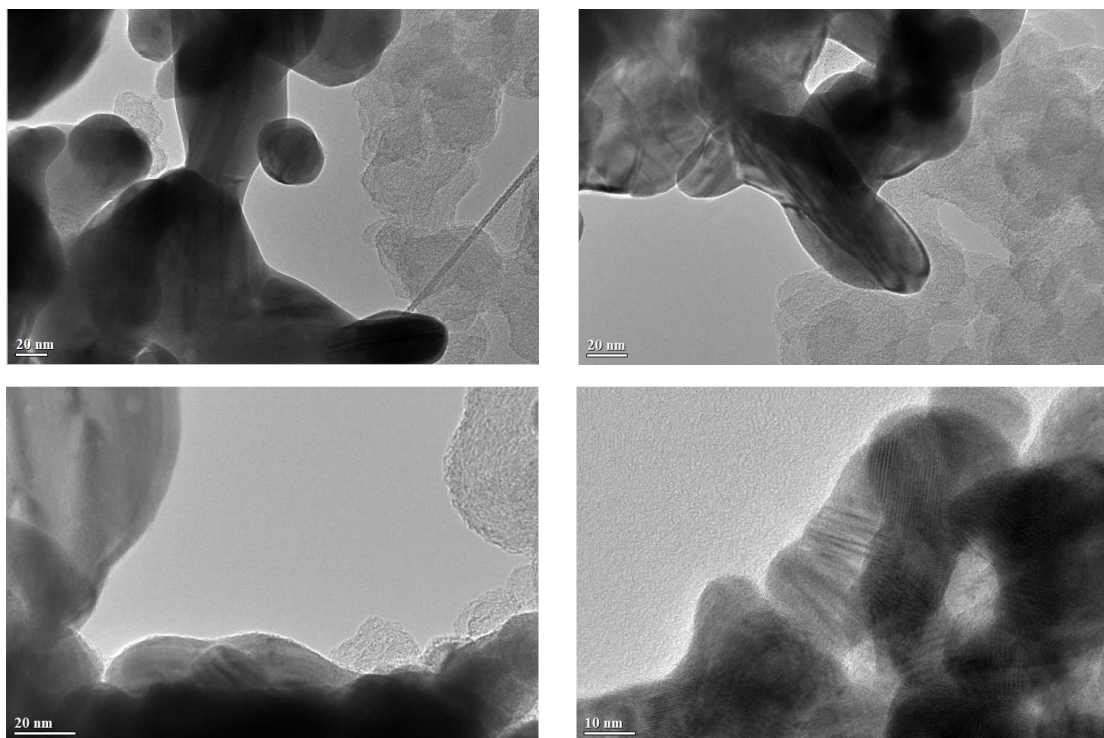

**Fig. S5.** The different high-resolution transmission electron microscopy images of the Ag-C.

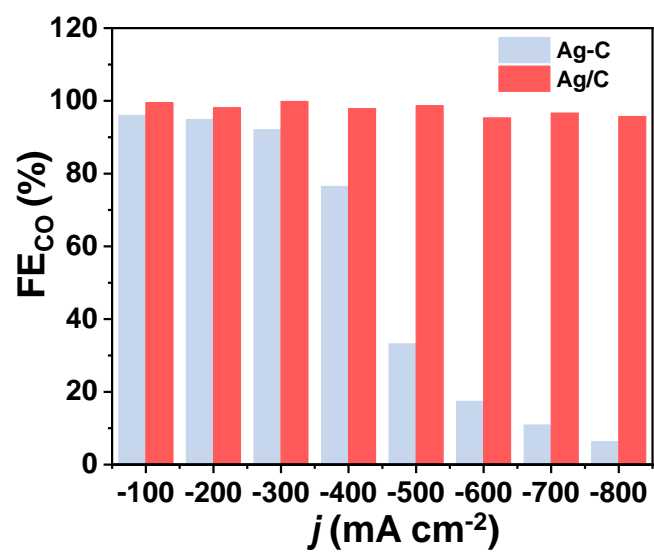

**Fig. S6.** Faradaic efficiency of CO of the Ag/C and Ag-C catalysts in 1 M KOH.

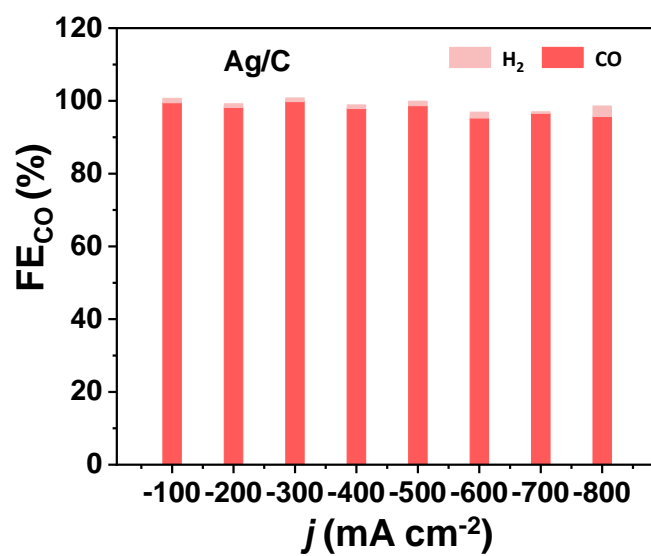

Fig. S7. Faradaic efficiencies of CO and H<sub>2</sub> on the Ag/C in 1 M KOH.



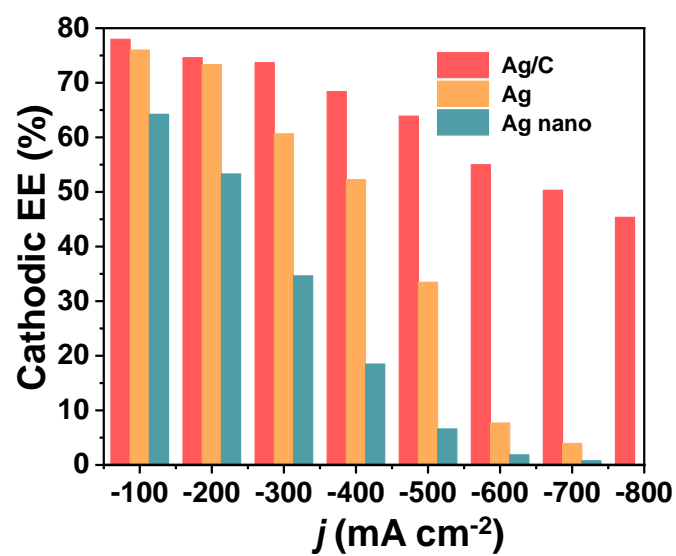

**Fig. S8.** Cathodic energy efficiency at 700 mA cm<sup>-2</sup> of Ag nano, Ag, Ag/C in 1 M KOH.

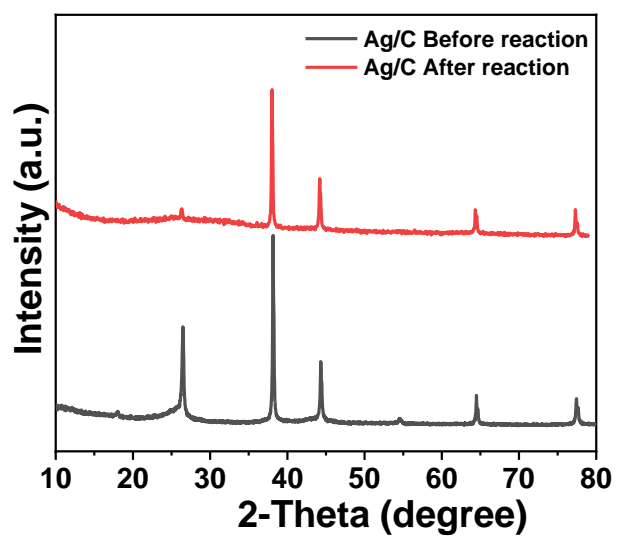

**Fig. S9.** X-ray diffraction patterns of the Ag/C before and after reaction.

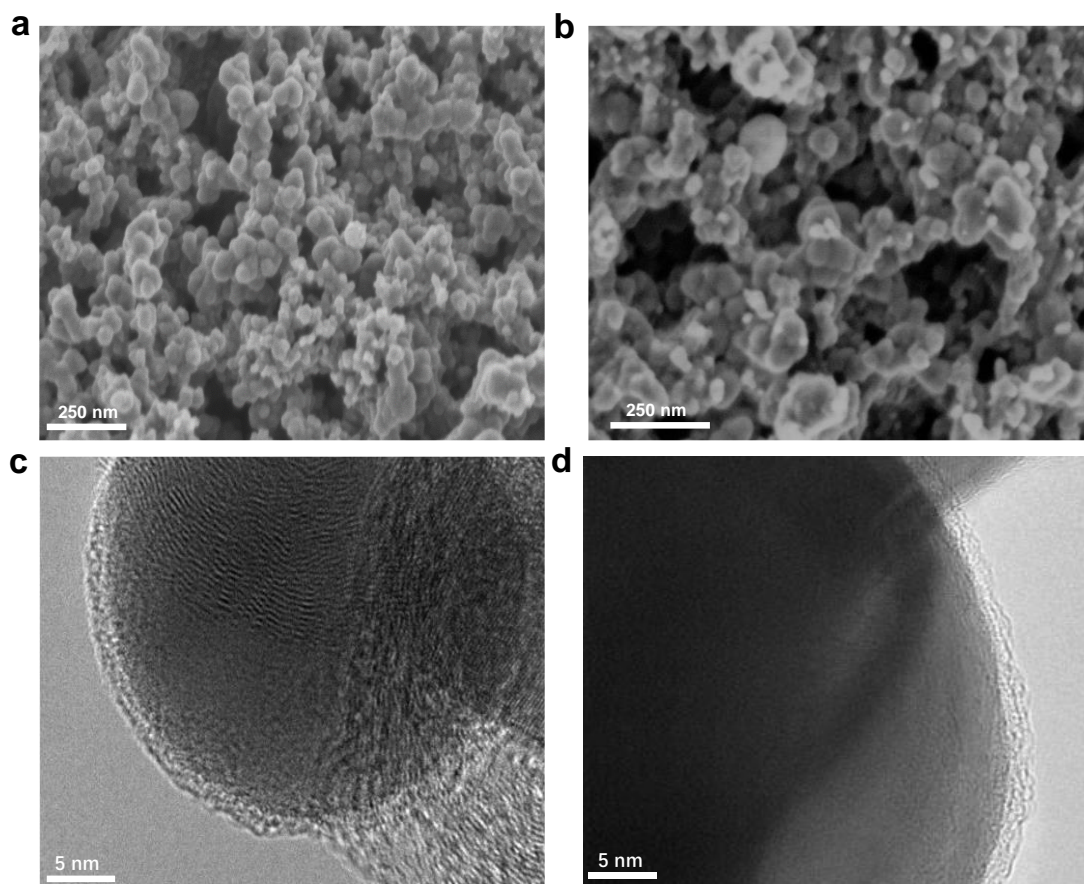

**Fig. S10.** (a) Scanning electron microscopy and (c) high-resolution transmission electron microscopy images of the Ag/C before reaction. (b) scanning electron microscopy and (d) high-resolution transmission electron microscopy images of the Ag/C after reaction.

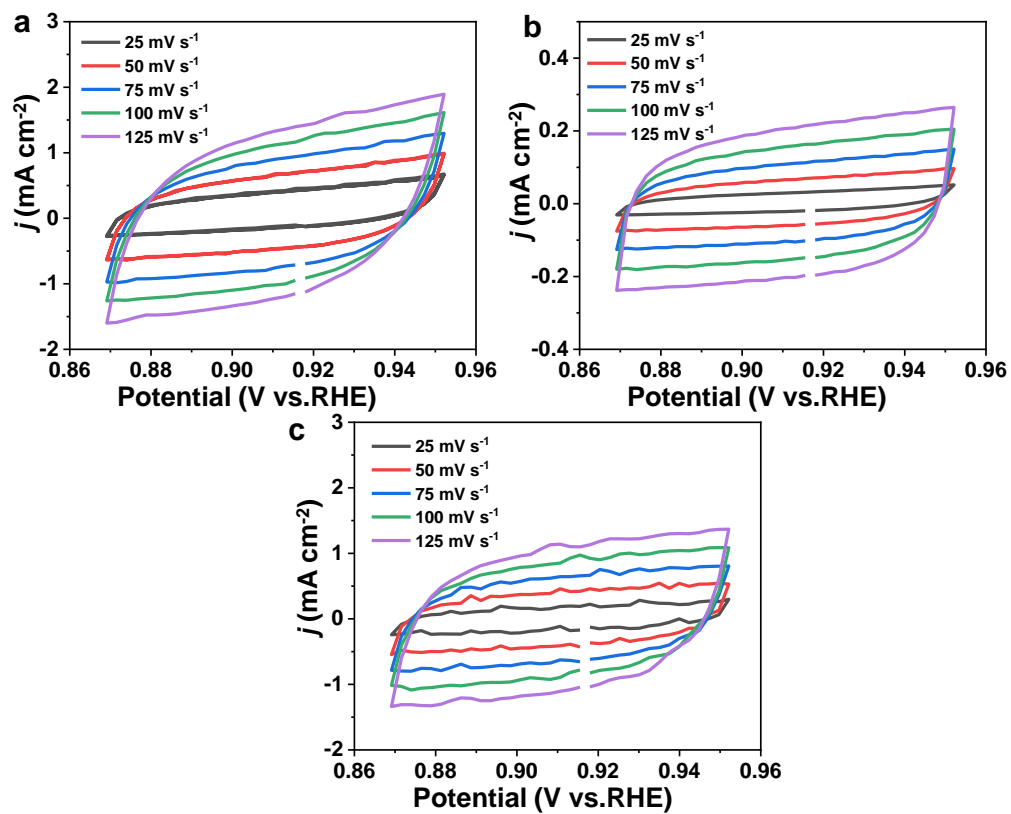

**Fig. S11.** Cyclic voltammetry curves of Ag nano (a), Ag (b), Ag/C (c) at different scan rates of 25, 50, 75, 100 and 125 mV s<sup>-1</sup> collected.

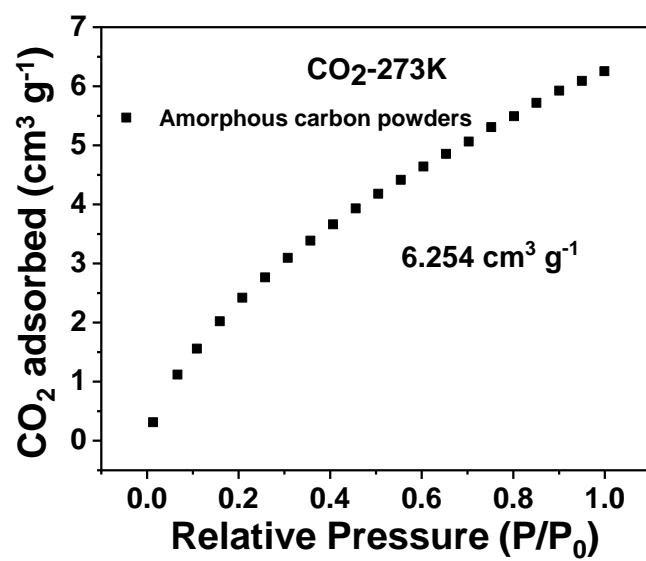

Fig. S12. CO<sub>2</sub> adsorption isotherm curve of amorphous carbon powders.

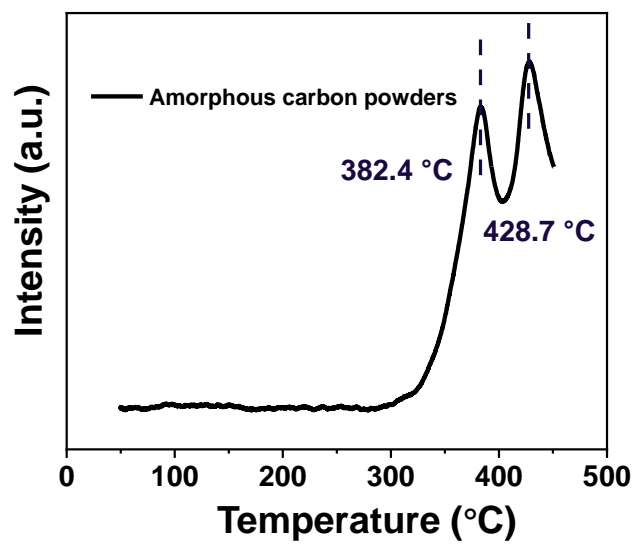

**Fig. S13.** Temperature programmed desorption of CO<sub>2</sub> measurement (CO<sub>2</sub>-TPD) profiles of amorphous carbon powders.

**Table S1.** The crystal sizes and full width at half maxima (FWHM) values of the (111) plane of the catalysts.

| <b>Catalyst</b> | <b>Crystallite sizes(nm)</b> | <b>FWHM</b> |
|-----------------|------------------------------|-------------|
| Ag nano         | 27.1                         | 0.348       |
| Ag              | 45.3                         | 0.270       |
| Ag/C            | 47.5                         | 0.222       |

**Table S2.** Parameter values of equivalent circuit components.

| <b>Catalyst</b> | <b><math>R_s(\Omega)</math></b> | <b><math>R_{ct}(\Omega)</math></b> |
|-----------------|---------------------------------|------------------------------------|
| Ag nano         | 7.189                           | 5.629                              |
| Ag              | 6.802                           | 1.681                              |
| Ag/C            | 6.884                           | 0.644                              |



**Table S3.** Performance of CO<sub>2</sub> reduced to CO on contrast catalysts.

| <b>Catalysts</b>     | <b>j (mA cm<sup>-2</sup>)</b> | <b>FE<sub>CO</sub> (%)</b> | <b>References</b> |
|----------------------|-------------------------------|----------------------------|-------------------|
| <b>Ag/C</b>          | <b>-800</b>                   | <b>95</b>                  | <b>This work</b>  |
|                      | <b>-700</b>                   | <b>96.6</b>                |                   |
|                      | <b>-600</b>                   | <b>95.3</b>                |                   |
| Ag powder            | -480                          | 91.2                       | 1 <sup>1</sup>    |
| Ag/MPL-3C            | -100                          | 98.80                      | 2 <sup>2</sup>    |
| sputtered<br>Ag/PTFE | -180                          | 89.70                      | 3 <sup>3</sup>    |
| Ag/PTFE              | -253                          | 84.30                      | 4 <sup>4</sup>    |
| Ag NP                | -281                          | 97.5                       | 5 <sup>5</sup>    |
| Ag NP                | -248                          | 94.70                      | 6 <sup>6</sup>    |
| Ag/C                 | -231                          | 83.5                       | 7 <sup>7</sup>    |
| Ag DAT               | -109                          | 93                         | 8 <sup>8</sup>    |
| Ag-NOLI              | -500                          | 84                         | 9 <sup>9</sup>    |
| AgSn                 | -200                          | 100                        | 10 <sup>10</sup>  |
| AgNP/MWCNT           | -368                          | 95                         | 11 <sup>11</sup>  |
| Ag-alloyed Zn        | -400                          | 72                         | 12 <sup>12</sup>  |
| Au25/C               | -600                          | 90                         | 13 <sup>13</sup>  |
| AuCu                 | -104                          | 75                         | 14 <sup>14</sup>  |
| AuCuB                | -76                           | 99                         | 15 <sup>15</sup>  |
| MWNT/PyPBI/Au        | -267                          | 60                         | 16 <sup>16</sup>  |
| h-NiNC               | -513                          | 90                         | 17 <sup>17</sup>  |
| SbCu                 | -497                          | 91                         | 18 <sup>18</sup>  |
| ZnAg                 | -500                          | 74                         | 19 <sup>19</sup>  |

## References

1. S. Verma, X. Lu, S. Ma, R. I. Masel and P. J. Kenis, *Phys Chem Chem Phys*, 2016, **18**, 7075-7084.
2. R. Wang, H. Haspel, A. Pustovarenko, A. Dikhtiarenko, A. Russkikh, G. Shterk, D. Osadchii, S. Ould-Chikh, M. Ma, W. A. Smith, K. Takanabe, F. Kapteijn and J. Gascon, *ACS Energy Letters*, 2019, **4**, 2024-2031.
3. C.-T. Dinh, F. P. García de Arquer, D. Sinton and E. H. Sargent, *ACS Energy Letters*, 2018, **3**, 2835-2840.
4. C. M. Gabardo, A. Seifitokaldani, J. P. Edwards, C.-T. Dinh, T. Burdyny, M. G. Kibria, C. P. O'Brien, E. H. Sargent and D. Sinton, *Energy & Environmental Science*, 2018, **11**, 2531-2539.
5. B. Kim, F. Hillman, M. Ariyoshi, S. Fujikawa and P. J. A. Kenis, *Journal of Power Sources*, 2016, **312**, 192-198.
6. S. Ma, R. Luo, S. Moniri, Y. Lan and P. J. A. Kenis, *Journal of The Electrochemical Society*, 2014, **161**, F1124-F1131.
7. J. Hong, K. T. Park, Y. E. Kim, D. Tan, Y. E. Jeon, J. E. Park, M. H. Youn, S. K. Jeong, J. Park, Y. N. Ko and W. Lee, *Chemical Engineering Journal*, 2022, **431**.
8. C. E. Tornow, M. R. Thorson, S. Ma, A. A. Gewirth and P. J. Kenis, *J Am Chem Soc*, 2012, **134**, 19520-19523.
9. D. Kim, S. Yu, F. Zheng, I. Roh, Y. Li, S. Louisia, Z. Qi, G. A. Somorjai, H. Frei, L.-W. Wang and P. Yang, *Nature Energy*, 2020, **5**, 1032-1042.
10. C. Cai, B. Liu, K. Liu, P. Li, J. Fu, Y. Wang, W. Li, C. Tian, Y. Kang, A. Stefanu, H. Li, C. W. Kao, T. S. Chan, Z. Lin, L. Chai, E. Cortes and M. Liu, *Angew Chem Int Ed Engl*, 2022, **61**, e202212640.
11. S. Ma, R. Luo, J. I. Gold, A. Z. Yu, B. Kim and P. J. A. Kenis, *J. Mater. Chem. A*, 2016, **4**, 8573-8578.
12. S. Lamaison, D. Wakerley, J. Blanchard, D. Montero, G. Rousse, D. Mercier, P. Marcus, D. Taverna, D. Giaume, V. Mougél and M. Fontecave, *Joule*, 2020, **4**, 395-406.
13. B. Kim, H. Seong, J. T. Song, K. Kwak, H. Song, Y. C. Tan, G. Park, D. Lee and J. Oh, *ACS Energy Lett.*, 2019, **5**, 749-757.
14. Y. Han, Z. Wang, X. Han, W. Fang, Y. Zhou, K. Lei, B. You, H. S. Park and B. Y. Xia, *ACS Sustain. Chem. Eng.*, 2021, **9**, 2609-2615.
15. Y. Liu, Y. Fang, Q. Yuan, J. Lu and H. Wang, *Green Chem.*, 2023, **25**, 1339-1344.
16. H. M. Jhong, C. E. Tornow, C. Kim, S. Verma, J. L. Oberst, P. S. Anderson, A. A. Gewirth, T. Fujigaya, N. Nakashima and P. J. A. Kenis, *Chemphyschem*, 2017, **18**, 3274-3279.
17. Y. Chen, J. Zhang, J. Tian, Y. Guo, F. Xu, Y. Zhang, X. Wang, L. Yang, Q. Wu and Z. Hu, *Adv. Funct. Mater.*, 2023, 2214658.
18. J. Li, H. Zeng, X. Dong, Y. Ding, S. Hu, R. Zhang, Y. Dai, P. Cui, Z. Xiao, D. Zhao, L. Zhou, T. Zheng, J. Xiao, J. Zeng and C. Xia, *Nat Commun*, 2023, **14**, 340.
19. S. Lamaison, D. Wakerley, F. Kracke, T. Moore, L. Zhou, D. U. Lee, L. Wang, M. A. Hubert, J. E. Aviles Acosta, J. M. Gregoire, E. B. Duoss, S. Baker, V. A. Beck, A. M. Spormann, M. Fontecave, C. Hahn and T. F. Jaramillo, *Adv Mater*, 2022, **34**, e2103963.
